# Supplementary material for: In vivo function of Pgβglu-1 in the release of acetophenones in white spruce
Source: PeerJ. 2017 Jul 7;5:e3535. doi: 10.7717/peerj.3535 (PMC5502087; doi:10.7717/peerj.3535)
Supplement: Supplemental Information 3 [file peerj-05-3535-s003.xlsx]

## Sheet: Sheet1
					ET	SS
				PG653	0	0
				B1	17774.7	3944.85
				B2	2857.96	712
				B3	11886.1	1882.48
				B4	7669.18	1483.65
				B5	nd	2228.29
				B6	6005.12	4210.66
				B7	6398.11	5269.51
				B8	9023.96	1305.72
				B9	7536.46	1845.63
				B10	21633.4	6004.36
				B11	6972.17	5451.93
				PG653	1.02948	0
				G1	46256.8	16137.2
				G2	49822.3	27734.6		ET= embryogenic tissue
				G3	28293.8	21870.8		SS= somatic seedlings
				G4	36952.4	19219.3
				G5	41499.6	23147.2		B1-B11: Pgβglu-1 lines
				G6	10311	6276.93		G1-G11: gfp lines
				G7	43034.2	23565.2		PG653: non-transformed line
				G8	55707.5	17892.2
				G9	86414.9	18465.8
				G10	30753.7	16457.6
				G11	55013.5	21398.8
											Average									ET	SS
											ET	SS		ET	SS				PG653	0	0
									.	Pg653	0	0							L1	17774.7	3944.85
										transformants	9775.72	3121.74		5777.35	1896.47				L2	2857.96	712
									.	Pg653	1	0							L3	7669.18	1483.65
										transformants	44005.4	19287.8		19262.2	5527.34				L4	11886.1	1882.48
																			PG653	1.02948	0
																			L1	46256.8	16137.2
																			L2	49822.3	27734.6
																			L3	28293.8	21870.8
																			L4	36952.4	19219.3
