# Supplementary material for: In vivo function of Pgβglu-1 in the release of acetophenones in white spruce
Source: PeerJ journal article supplement (doi:10.7717/peerj.3535), 2017-07-07
Supplement: Supplemental_Figure_1.pdf [file Supplemental_Figure_1.pdf]

Supplementary Fig. 1 Plasmid map and sequence for pCAMBIA2300\_MJMGW\_GFP

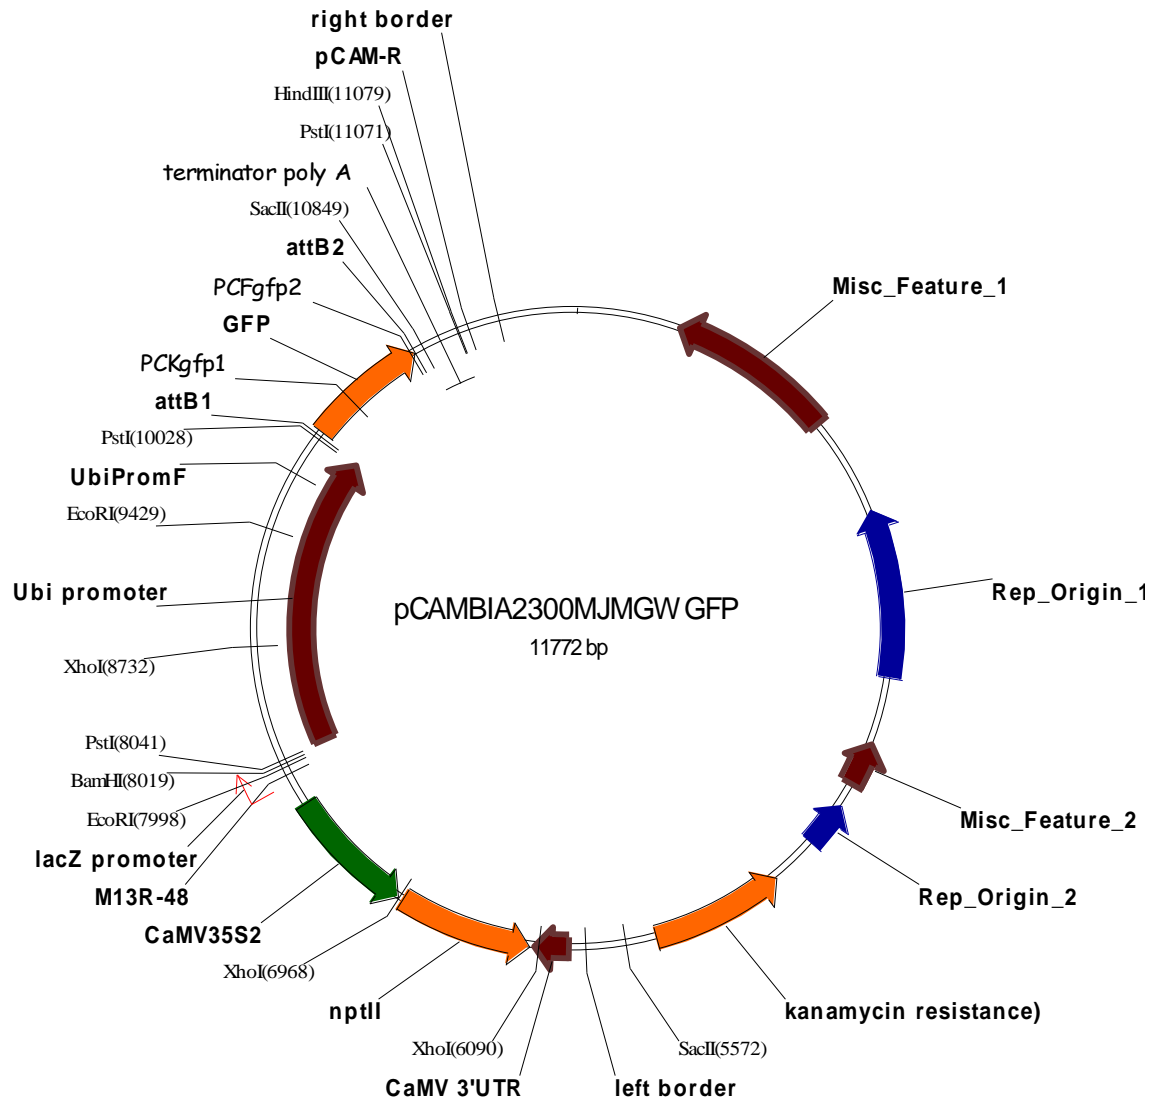

**Sequence features :**

gray ubiquitin promoter

green *gfp*

yellow 35S terminator polyA

CGGCACCAGGCGCGACCGCCCGGAGCTGGCCAGGATGCTTGACCACCTACGCCCTGGCGACGTTGTGACAGTGACCAGGCTAGACCGCCTGGCCCGCAGCACC  
CGCGACCTACTGGACATTGCCGAGCGCATCCAGGAGGCCGGCGCGGGCCTGCGTAGCCTGGCAGAGCCGTGGGCGGACACCACCACGCCGGCCGGCCGCATGG  
TGTTGACCGTGTTCCGCCGATTGCCGAGTTCGAGCGTTCCTAATCATCGACCGCACCCGAGCGGGCGCGAGGCCGCCAAGGCCCGAGGCGTGAAGTTTGGC  
CCCCGCCCTACCCTACCCCGGCACAGATCGCGCACGCCCGCGAGCTGATCGACCAGGAAGGCCGCACCGTGAAAGAGGCGGCTGCACTGCTTGGCGTGCATCG  
CTCGACCTGTACCGCGCACTTGAGCGCAGCGAGGAAGTGACGCCACCGAGGCCAGGCGGGCGCGGTGCCTTCCGTGAGGACGCATTGACCGAGGCCGACGCC  
CTGGCGGCCGCCGAGAATGAACGCCAAGAGGAACAAGCATGAAACCGCACAGGACGGCCAGGACGAACCGTTTTTCATTACCGAAGAGATCGAGGCGGAGA  
TGATCGCGGCCGGGTACGTGTTTCGAGCCGCCCGCGCACGTCTCAACCGTGCGGTGCATGAAATCCTGGCCGGTTTTGTCTGATGCCAAGCTGGCGGCCTGGCCG  
GCCAGCTTGGCCGCTGAAGAAACCGAGCGCCCGCTCTAAAAAGGTGATGTGATTTGAGTAAACAGCTTGCATGCGGTCGCTGCGTATATGATGCGATG  
AGTAAATAAACAATAACGCAAGGGGAACGCATGAAGTTATCGCTGTACTTAACCAGAAAGCGGGTCAGGCAAGACGACCATCGCAACCCATCTAGCCCCGC  
CCCTGCAACTCGCCGGGGCCGATGTTCTGTTAGTCGATTCCGATCCCCAGGGCAGTGCCCGGATTGGGCGGCCGTGCGGGAAGATCAACCGCTAACCGTTGTC  
GGCATCGACCGCCGACGATTGACCGCGACGTGAAGGCCATCGGCCGGCGGACTTCGTAGTGATCGACGGAGCGCCCCAGGCGGCGGACTTGGCTGTGTCCG  
CGATCAAGGCAGCCGACTTCGTGCTGATTCCGGTGCAGCCAAGCCCTTACGACATATGGGCCACCGCCGACCTGGTGGAGCTGGTTAAGCAGCGCATTGAGGTC  
ACGGATGGAAGGCTACAAGCGCCTTTGTCGTGTCGCGGGCGATCAAAGGCACGCGCATCGGCGGTGAGGTTGCCGAGGCGCTGGCCGGGTACGAGCTGCC  
ATTCTTGAGTCCCGTATCACGCAGCGGTGAGCTACCCAGGCACTGCCGCCCGCGCACAAACCGTTCTTGAATCAGAACCCGAGGGCGACGCTGCCCGCGAGGT  
CCAGGCGCTGGCCGCTGAAATTAATCAAACTCATTGAGTTAATGAGGTAAGAGAAAATGAGCAAAAGCACAAACACGCTAAGTGCCGGCCGTCCGAGCGC  
ACGCAGCAGCAAGGCTGCAACGTTGGCCAGCCTGGCAGACACGCCAGCCATGAAGCGGGTCAACTTTAGTTGCCGGCGGAGGATCACACCAAGCTGAAGATG  
TACGCGGTACGCCAAGGCAAGACCATTACCGAGCTGCTATCTGAATACATCGCGCAGCTACCAGAGTAAATGAGCAAATGAATAAATGAGTAGATGAATTTAG  
CGGCTAAAGGAGGCGGCATGAAAATCAAGAACAACCAGGCACCGACCCGTGGAATGCCCATGTGTGGAGGAACGGGCGGTTGGCCAGGCGTAAGCGGCT  
GGGTTGTCTGCCGGCCCTGCAATGGCACTGGAACCCCCAAGCCCGAGGAATCGGCGTGACGGTCGCAAACCATCCGGCCCCGGTACAAATCGGCGCGGCGCTGG  
GTGATGACCTGGTGGAGAAGTTGAAGGCCGCGCAGGCCGCCAGCGGCAACGCATCGAGGCAGAAGCACGCCCGGTGAATCGTGGAAGCGGCGGCTGATC  
GAATCCGCAAAGAATCCCGCAACCGCCGCGCAGCCGGTGCGCCGTGATTAGGAAGCCGCCAAGGGCGACGAGCAACCAGATTTTTTCGTTCCGATGCTCTAT  
GACGTGGGCACCCGCGATAGTCGAGCATCATGGACGTGGCCGTTTTCCGTCTGTGCAAGCGTGACCGACGAGCTGGCGAGGTGATCCGCTACGAGCTTCCAGA  
CGGGCACGTAGAGTTTTCCGACGGGCCGCGCCGGCATGGCCAGTGTGTGGATTACGACCTGGTACTGATGGCGGTTTTCCCATCTAACCGAATCCATGAACCGAT

ACCGGGAAGGGAAGGGAGACAAGCCCGGCCGCGTGTCCGTCCACACGTTGCGGACGTAAGTTCTGCCGGCGAGCCGATGGCGGAAAGCAGAAAGACG  
ACCTGGTAGAAACCTGCATTCGGTTAAACACCACGCACGTTGCCATGCAGCGTACGAAGAAGGCCAAGAACGGCCGCCTGGTGACGGTATCCGAGGGTGAAGC  
CTTGATTAGCCGCTACAAGATCGTAAAGAGCGAAACCCGGGCGGCCGAGTACATCGAGATCGAGCTAGCTGATTGGATGTACCGCGAGATCACAGAAGGCAAG  
AACCCGGACGTGCTGACGGTTCACCCCGATTACTTTTTGATCGATCCCGGCATCGGCCGTTTTCTCTACCGCCTGGCACGCCGCGCCGAGGCAAGGCAGAAGCC  
AGATGGTTGTTCAAGACGATCTACGAACGCAGTGGCAGCGCCGAGAGTTCAAGAAGTTCTGTTTCACCGTGCGCAAGCTGATCGGGTCAAATGACCTGCCGGA  
GTACGATTTGAAGGAGGAGGCGGGCAGGCTGCCCCGATCCTAGTCATGCGCTACCGCAACCTGATCGAGGGCGAAGCATCCGCCGGTTCCTAATGTACGGAG  
CAGATGCTAGGGCAAATTGCCCTAGCAGGGGAAAAAGGTGCAAAAAGGTCTCTTTCTGTGGATAGCACGTACATTGGGAACCCAAAGCCGTACATTGGGAACCG  
GAACCCGTACATTGGGAACCCAAAGCCGTACATTGGGAACCCGGTCACACATGTAAGTGACTGATATAAAAGAGAAAAAAGGCGATTTTTCCGCCTAAAACCTCTT  
AAAACCTTATAAACTCTTAAAACCCGCCTGGCCTGTGCATAACTGTCTGCCAGCGCACAGCCGAAGAGCTGCAAAAAGCGCCTACCCTTCGGTCGCTGCGCTC  
CCTACGCCCGCCGCTTCGCGTCGGCCTATCGCGGCCGCTGGCCGCTCAAAAATGGCTGGCCTACGGCCAGGCAATCTACCAGGGCGCGGACAAGCCGCGCCGT  
CGCCACTCGACCGCCGCGCCACATCAAGGCACCCTGCCTCGCGGTTTTCGGTGATGACGGTGA AACCTCTGACACATGCAGCTCCCGGAGACGGTCACAGC  
TTGTCTGTAAGCGGATGCCGGGAGCAGACAAGCCCGTCAGGGCGCGTCAGCGGGTGTGGCGGGTGTGGGGGCGCAGCCATGACCCAGTCACGTAGCGATAG  
CGGAGTGTATACTGGCTTAACTATGCGGCATCAGAGCAGATTGACTGAGAGTGCACCATATGCGGTGTGAAATACCGCACAGATGCGTAAGGAGAAAAATACCG  
CATCAGGCGCTCTTCCGCTTCTCGCTCACTGACTCGCTGCGCTCGGTCGTTCCGCTGCGGCGAGCGGTATCAGCTCACTCAAAGGCGGTAATACGGTTATCCACA  
GAATCAGGGGATAACGCAGGAAAGAACATGTGAGCAAAAAGGCCAGCAAAAAGGCCAGGAACCGTAAAAAGGCCGCGTTGCTGGCGTTTTTCCATAGGCTCCGCC  
CCCCTGACGAGCATCACAAAAATCGACGCTCAAGTCAGAGGTGGCGAAACCCGACAGGACTATAAAGATACCAGGCGTTTTCCCCTGGAAGCTCCCTCGTGCGC  
TCTCCTGTTCCGACCCTGCCGCTTACCGGATACCTGTCCGCTTTCTCCCTTCGGGAAGCGTGGCGCTTTCTCATAGCTCACGCTGTAGGTATCTCAGTTCGGTGT  
GGTGTTCGCTCCAAGCTGGGCTGTGTGCACGAACCCCCGTTAGCCCGACCGCTGCGCCTTATCCGGTAACTATCGTCTTGAGTCCAACCCGTAAGACACGA  
CTTATCGCCACTGGCAGCAGCCACTGGTAACAGGATTAGCAGAGCGAGGTATGTAGGCGGTGCTACAGAGTTCTTGAAGTGGTGGCCTAACTACGGCTACACTA  
GAAGGACAGTATTTGGTATCTGCGCTCTGCTGAAGCCAGTTACCTTCGGAAAAAGAGTTGGTAGCTCTTGATCCGGCAAACAAACCACCGCTGGTAGCGGTGGT  
TTTTGTTTGAAGCAGCAGATTACGCGCAGAAAAAAGGATCTCAAGAAGATCCTTTGATCTTTTCTACGGGGTCTGACGCTCAGTGGAAACGAAAACTCACGTT  
AAGGGATTTTGGTCATGCATTCTAGGTAATAAACAATTCATCCAGTAAATATAATATTTTATTTTCTCCCAATCAGGCTTGATCCCCAGTAAGTCAAAAAATAGC  
TCGACATACTGTTCTTCCCCGATATCCTCCCTGATCGACCGGACGCAGAAAGGCAATGTCATAACCACTTGCCGCCCTGCCGCTTCTCCCAAGATCAATAAAGCCACT  
TACTTTGCCATCTTTCACAAAGATGTTGCTGTCTCCAGGTGCGCGTGGGAAAAGACAAGTTCTCTTCGGGCTTTCCGCTTTAAAAAATCATACAGCTCGCGG  
GATCTTTAAATGGAGTGTCTTCTCCAGTTTTCGCAATCCACATCGGCCAGATCGTTATTAGTAAGTAATCCAATTCGGCTAAGCGGCTGTCTAAGCTATTCGTA  
TAGGGACAATCCGATATGTCGATGGAGTGAAAGAGCCTGATGCACTCCGCATACAGCTCGATAATCTTTTCAGGGCTTTGTTTCATCTTCATACTCTTCCGAGCAA  
GGACGCCATCGGCCTCACTCATGAGCAGATTGCTCCAGCCATCATGCCGTTCAAAGTGCAGGACCTTTGGAACAGGCAGCTTTCCTTCCAGCCATAGCATCATGTC  
CTTTCCGTTCCACATCATAGGTGGTCCCTTATACCGGCTGTCCGTCATTTTTAAATATAGTTTTTCAATTTCTCCACCAGCTTATATACCTTAGCAGGAGACATT  
CCTTCCGATCTTTTACGCAGCGGTATTTTTCGATCAGTTTTTCAATTCGGTGATATTCTATTTTAGCCATTTATTATTTCTTCTCTTTTCTACAGTATTTAAAG  
ATACCCCAAGAAGCTAATTATAACAAGACGAACCTCAATTCAGTTCCTTGCATTCTAAAACCTTAAATACCAGAAAACAGCTTTTTCAAAGTTGTTTTCAAAGTT

GGCGTATAACATAGTATCGACGGAGCCGATTTTGAACCCGCGGTGATCACAGGCAGCAACGCTCTGTCATCGTTACAATCAACATGCTACCTCCGCGAGATCAT  
CCGTGTTTCAAACCCGGCAGCTTAGTTGCCGTTCTTCCGAATAGCATCGGTAACATGAGCAAAGTCTGCCGCTTACAACGGCTCTCCCGCTGACGCCGTCCCGGA  
CTGATGGGCTGCCTGTATCGAGTGGTGATTTTGTGCCGAGCTGCCGGTCGGGGAGCTGTTGGCTGGCTGGTGGCAGGATATATTGTGGTGTAAACAAATTGACG  
CTTAGACAACCTTAATAACACATTGCGGACGTTTTTAATGTACTGAATTAACGCCGAATTAATTCGGGGGATCTGGATTTTAGTACTGGATTTTGGTTTTAGGAATT  
AGAAATTTTATTGATAGAAGTATTTTACAAATACAAATACATACTAAGGGTTTCTTATATGCTCAACACATGAGCGAAACCCTATAGGAACCCTAATCCCTTATCT  
GGGAACTACTCACACATTATTATGGAGAAACTCGAGCTTGTGATCGACTCTAGCTAGAGGATCGATCCGAACCCAGAGTCCCGCTCAGAAGAACTCGTCAAGA  
AGGCGATAGAAGGCGATGCGCTGCGAATCGGGAGCGGCGATACCGTAAAGCACGAGGAAGCGGTGAGCCCATTCGCCGCAAGCTCTTCAGCAATATCACGGG  
TAGCCAACGCTATGTCCTGATAGCGGTCCGCCACACCCAGCCGCCACAGTCGATGAATCCAGAAAAGCGGCCATTTTCCACCATGATATTCGGCAAGCAGGCAT  
CGCCATGTGTCACGACGAGATCCTCGCCGTCGGGCATGCGCGCCTTGAGCCTGGCGAACAGTTCGGCTGGCGGAGCCCCTGATGCTCTTCGTCCAGATCATCCT  
GATCGACAAGACCGGCTTCCATCCGAGTACGTGCTCGCTCGATGCGATGTTTCGTTGGTGGTGAATGGGCAGGTAGCCGGATCAAGCGTATGCAGCCGCCGC  
ATTGCATCAGCCATGATGGATACTTTCTCGGCAGGAGCAAGGTGAGATGACAGGAGATCCTGCCCGGCACTTCGCCCAATAGCAGCCAGTCCCTTCCCGCTTCA  
GTGACAACGTCGAGCACAGCTGCGCAAGGAACGCCCGTCGTGGCCAGCCACGATAGCCGCGCTGCCTCGTCCTGGAGTTCATTAGGGCACCGGACAGGTGCGG  
TCTTGACAAAAAGAACCGGGCGCCCCTGCGCTGACAGCCGGAACACGGCGGCATCAGAGCAGCCGATTGTCTGTTGTGCCAGTCATAGCCGAATAGCCTCTCC  
ACCCAAGCGGCCGGAGAACCTGCGTGCAATCCATCTTGTTCAATCCCATGGTCGATCGACAGATCTGCGAAAGCTCGAGAGAGATAGATTTGTAGAGAGAGAC  
TGGTGATTTTACGCGTGTCTCTCAAATGAAATGAACTTCTTATATAGAGGAAGGTCTTGCGAAGGATAGTGGGATTGTGCGTCATCCCTTACGTCAGTGGAGA  
TATCACATCAATCCACTTGCTTTGAAGACGTGGTTGGAACGTCTTCTTTTTCCACGATGCTCCTCGTGGGTGGGGTCCATCTTTGGGACCACTGTGCGCAGAGGC  
ATCTTGAACGATAGCCTTTCTTTATCGCAATGATGGCATTGTAGGTGCCACCTTCTTTTCTACTGTCCTTTTATGATGAAGTGACAGATAGCTGGGCAATGGAATC  
CGAGGAGTTTCCCGATATTACCCTTTGTTGAAAAGTCTCAATAGCCCTTTGGTCTTCTGAGACTGTATCTTTGATATTCTTGGAGTAGACGAGAGTGTCTGTCTCC  
ACCATGTTATCACATCAATCCACTTGCTTTGAAGACGTGGTTGGAACGTCTTCTTTTTCCACGATGCTCCTCGTGGGTGGGGTCCATCTTTGGGACCACTGTGCGG  
CAGAGGCATCTTGAACGATAGCCTTTCTTTATCGCAATGATGGCATTGTAGGTGCCACCTTCTTTTCTACTGTCCTTTTATGATGAAGTGACAGATAGCTGGGCAA  
TGGAATCCGAGGAGGTTTCCCGATATTACCCTTTGTTGAAAAGTCTCAATAGCCCTTTGGTCTTCTGAGACTGTATCTTTGATATTCTTGGAGTAGACGAGAGTGT  
CGTGCTCCACCATGTTGGCAAGCTGCTTAGCCAATACGCAAACCGCCTCTCCCGCGCGTTGGCCGATTCAATTAATGCAGCTGGCACGACAGGTTTCCCGACTG  
GAAAGCGGGCAGTGAGCGCAACGCAATTAATGTGAGTTAGCTCACTCATTAGGCACCCAGGCTTTACACTTTATGCTTCCGGCTCGTATGTTGTGTTGGAATTGT  
GAGCGGATAACAATTTACACAGGAAACAGCTATGACCATGATTACGAATTCGAGCTCGGTACCCGGGGATCCTCTAGAGTCGACCTGCAAGGGCAGCGTGACCC  
GGTCGTGCCCTCTCTAGAGATAATGAGCATTGCATGTCTAAGTTATAAAAAATTACCACATATTTTTTTTGTACACTTGTGTTGAAGTGAGTTTATCTATCTTTAT  
ACATATATTTAACTTTACTCTACGAATAATATAATCTATAGTACTACAATAATACAGTGTTTTAGAGAATCATATAAATGAACAGTTAGACATGGTCTAAAGGAC  
AATTGAGTATTTGACAACAGGACTCTACAGTTTTATCTTTTTAGTGTGCATGTGTTCTCCTTTTTTTTTGCAAATAGCTTCACCTATATAATACTTCATCCATTTTATT  
AGTACATCCATTTAGGGTTTAGGGTTAATGGTTTTTATAGACTAATTTTTTATGACATCTATTTTATTCTATTTTAGCCTCTAAATTAAGAAAATAAACTCTATTT  
TAGTTTTTTTATTTAATAATTTAGATATAAAATAGAATAAAATAAAGTGACTAAAATTAACAAATACCCTTTAAAGAAATTAATAAACTAAGGAAACATTTTTCT  
TGTTTTCGAGTAGATAATGCCAGCCTGTTAACGCCGTCGACGAGTCTAACGGACACCAACCAGCGAACCAGCAGCGTCGCGTCGGGCCAAGCGAAGCAGACGG

CACGGCATCTCTGTCGCTGCCTCTGGACCCCTCTCGAGAGTTCGCTCCACCGTTGGACTTGCTCCGCTGTCGGCATCCAGAAATTGCGTGGCGGAGCGGCAGAC  
GTGAGCCGGCACGGCAGGCGGCCTCCTCCTCTCACGGCACGGCAGCTACGGGGGATTCTTTCCACCGCTCCTTCGCTTCCCTTCCTCGCCCGCCGTAAT  
AAATAGACACCCCTCCACACCTCTTTCCCAACCTCGTGTGTTGTCGGAGCGCACACACACAACCAGATCTCCCCAAATCCACCCGTCGGCACCTCCGCTTCA  
AGGTACGCCGCTCGTCTCCCCCCCCCTCTACCTTCTCTAGATCGGCGTCCGGTCCATGGTTAGGGCCCGTAGTCTACTTCTGTTTCTGTTGTTGTTGTTG  
ATCCGTGTTTGTGTTAGATCCGTGCTGCTAGCGTTCGTACACGGATGCGACCTGTACGTAGACACGTTCTGATTGCTAACTTGCCAGTGTCTCTTTGGGAAT  
CCTGGGATGACTCTAGCCGTTCCGCAGACGGGATCGATTTTATGATTTTTTTGTTTCGTTGCATAGGGTTTGGTTTGCCTTTTCCTTATTTCAATATATGCCGTG  
CACTTGTGTTGTCGGGTCATCTTTTTCATGCTTTTTTTGTCTTGGTTGTGATGATGTGGTCTGGTTGGGCGGTCGTTCTAGATCGGAGTAGAATTCTGTTTCAA  
CCTGGTGGATTTATTAATTTGGATCTGTATGTGTGTGCCATACATATTCATAGTTACGAATTGAAGATGATGGATGGAAATATCGATCTAGGATAGGTATACATG  
TTGATGCGGGTTTTACTGATGCATATACAGAGATGCTTTTTGTTTCGCTTGGTTGTGATGATGTGGTGTGGTTGGGCGGTCGTTTCATTTCGTTCTAGATCGGAGTAGA  
ATACTGTTTCAAAGTGCCTGGTGTATTTATTAATTTGAACTGTATGTGTGTGCATACATCTTCATAGTTACGAGTTAAGATGGATGGAAATATCGATCTAGGA  
TAGGTATACATGTTGATGTGGGTTTTACTGATGCATATACATGATGGCATATGCAGCATCTATTCATATGCTCTAACCTTGAGTACCTATCTATTATAATAACAAG  
TATGTTTTATAATTTTATTTGATCTTGATATACTGGATGATGGCATATGCAGCAGCTATATGTGGATTTTTTAGCCCTGCCTTCATACGCTATTTATTTGCTTGGTA  
CTGTTTCTTTGTCGATGCTCACCTGTTGTTGGTGTACTTCTGCAGGTCGACTCTAGAGGAATCACAAGTTTGTACAAAAAGCAGGCTTAATGGTGAGCAAG  
GGCGAGGAGCTGTTACCGGGTGGTGCCATCCTGGTCGAGCTGGACGGCAGCTAAACGGCCACAAGTTCAGCGTGTCCGGCGAGGGCGAGGGCGATGCC  
ACCTACGGCAAGCTGACCCTGAAGTTCATCTGCACCACGGCAAGCTGCCCGTGCCTGGCCACCCTCGTGACCACCCTGACCTACGGCGTGCAGTGCTTACG  
CGCTACCCCGACCACATGAAGCAGCACGACTTCTCAAGTCCGCCATGCCGAAGGCTACGTCCAGGAGCGCACCATCTTCTCAAGGACGACGGCAACTACAAG  
ACCCGCGCCGAGGTGAAGTTCGAGGGCGACACCCTGGTGAACCGCATCGAGCTGAAGGGCATCGACTTCAAGGAGGACGGCAACATCCTGGGGCACAAGCTG  
GAGTACAACACTACAACAGCCACAACGTCTATATCATGGCCGACAAGCAGAAGAACGGCATCAAGGTGAAGTTCAGATCCGCCACAACATCGAGGACGGCAGCGT  
GCAGCTCGCCGACCACTACCAGCAGAACACCCCATCGGCGACGGCCCCGTGCTGCTGCCGACAACCACTACCTGAGCACCCAGTCCGCCCTGAGCAAAGACC  
CAACGAGAAGCGCGATCACATGGTCTGCTGGAGTTCGTGACCGCCCGGGATCACTCTCGGCATGGACGAGCTGTACAAGTACCCAGCTTTCTTGTACAAAGT  
GGTGATTCCACTAGTTCTAGAGCGGCCGCCACCGCGTGGAGTCCGCAAAAATCACCAGTCTCTCTCTACAAATCTATCTCTCTATTTTTCTCCAGAATAATGTG  
TGAGTAGTTCCAGATAAGGGAATTAGGGTCTTATAGGGTTTCGCTCATGTGTTGAGCATATAAGAAACCCTTAGTATGTATTTGTATTTGTAAAATACTTCTATC  
AATAAAATTTCTAATTCCTAAAACAAAATCCAGTGACCTGCAAGGCATGCAAGCTTGGCACTGGCCGTCGTTTTACAACGTCGTGACTGGGAAAACCCTGGCGTT  
ACCCAATTAATCGCCTTGCAGCACATCCCCCTTCGCCAGCTGGCGTAATAGCGAAGAGGCCCGCACCGATCGCCCTTCCCAACAGTTGCGCAGCCTGAATGGC  
GAATGCTAGAGCAGCTTGAAGTGGATCAGATTGTCGTTTCCGCCTCAGTTAACTATCAGTGTGTTGACAGGATATATTGGCGGGTAAACCTAAGAGAAAAG  
AGCGTTTATTAGAATAACGGATATTTAAAAGGGCGTGAAGGTTTATCCGTTTCGTCATTTGTATGTGCATGCCAACACAGGGTTCCCCTCGGGATCAAAGTA  
CTTTGATCCAACCCCTCCGCTGCTATAGTGCAGTCGGCTTCTGACGTTCAAGTGCAGCCGCTTCTGAAAACGACATGTCGCACAAGTCTAAGTTACGCGACAGGC  
TGCCGCCCTGCCCTTTTCTGGCGTTTTCTGTGCGGTGTTTTAGTCGCATAAAGTAGAATACTTGCAGTACAACCGGAGACATTACGCCATGAACAAGAGCGCC  
GCCGCTGGCCTGCTGGGCTATGCCCGCGTCAGCACCGACGACCAGGACTTGACCAACCAACGGGCCGAAGTGCAGCGGGCCGGCTGCACCAAGCTGTTTTCCGA  
GAAGATCAC
